# Supplementary material
Source: PubMed Central journal article supplement (PMC5026557)

# Supplementary figure 1

**A**

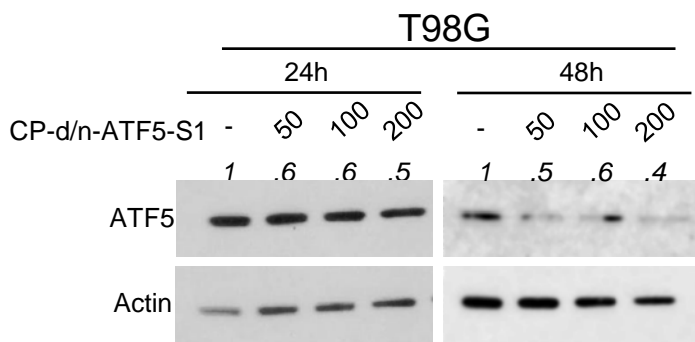

**B**

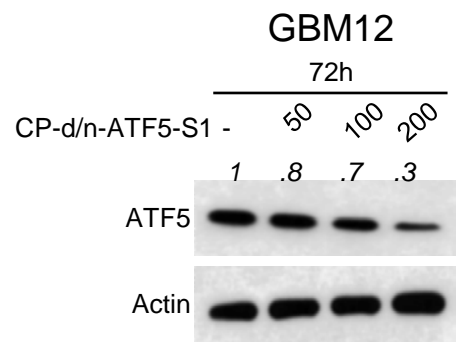

**C**

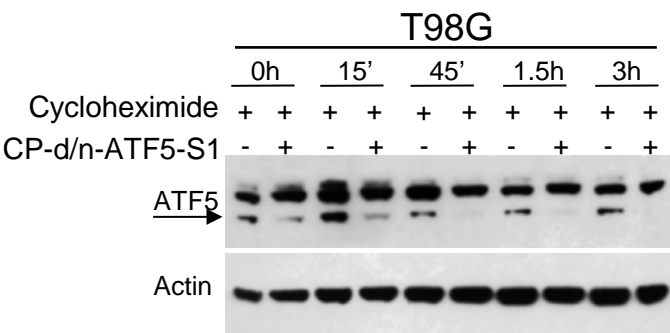

**D**

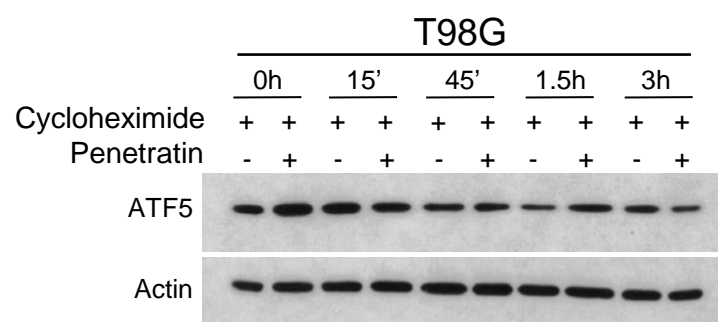

**E**

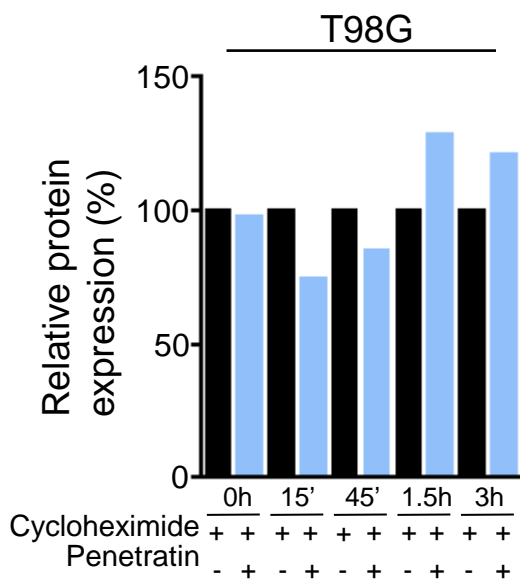

**F**

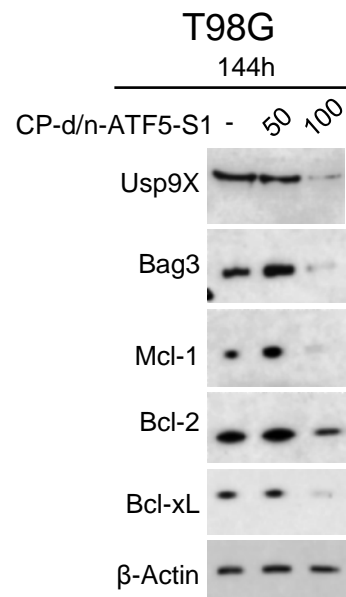

## Supplementary figure 2

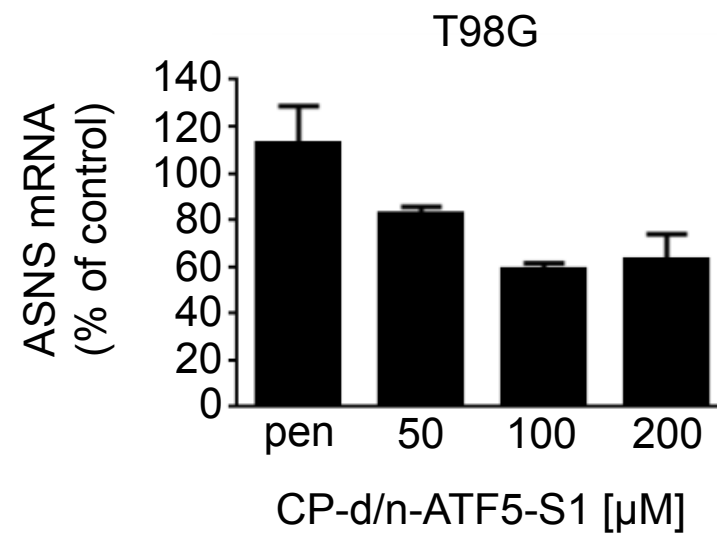

Supplementary figure 3

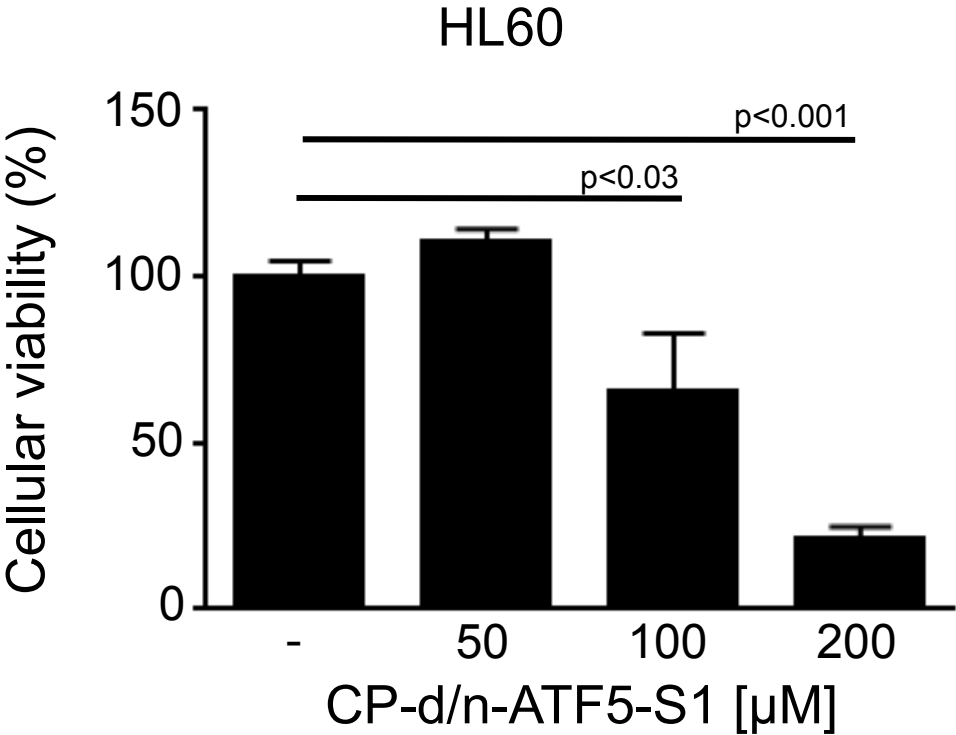

# Supplementary figure 4

A

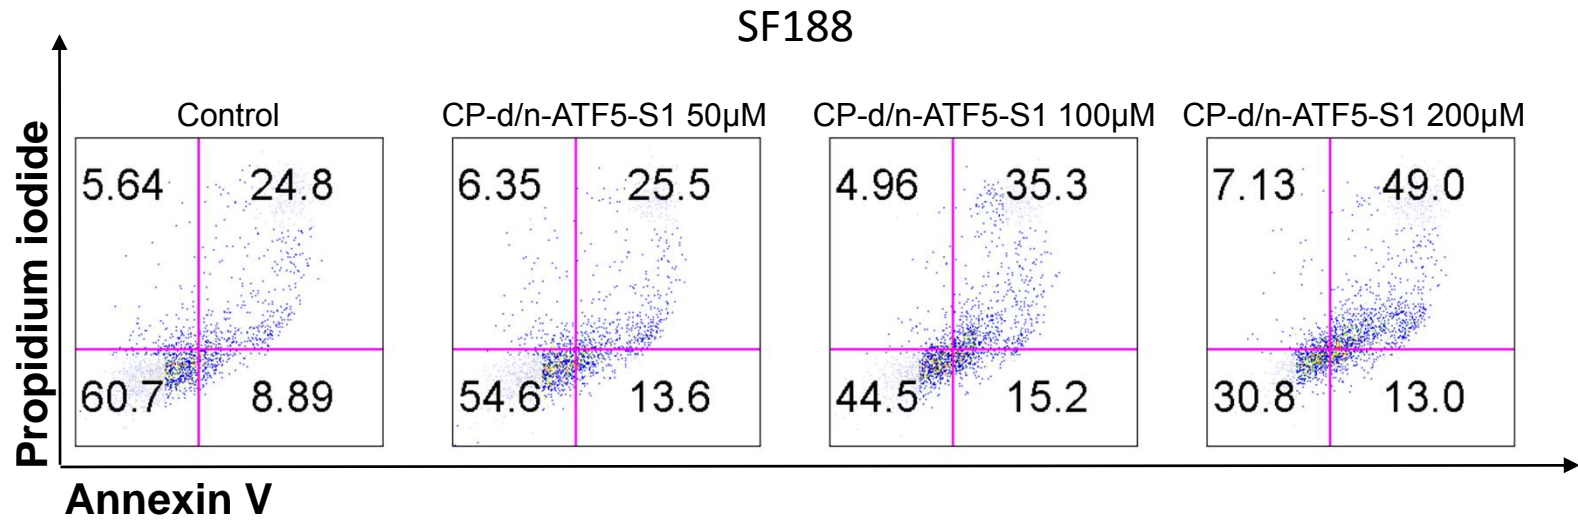

B

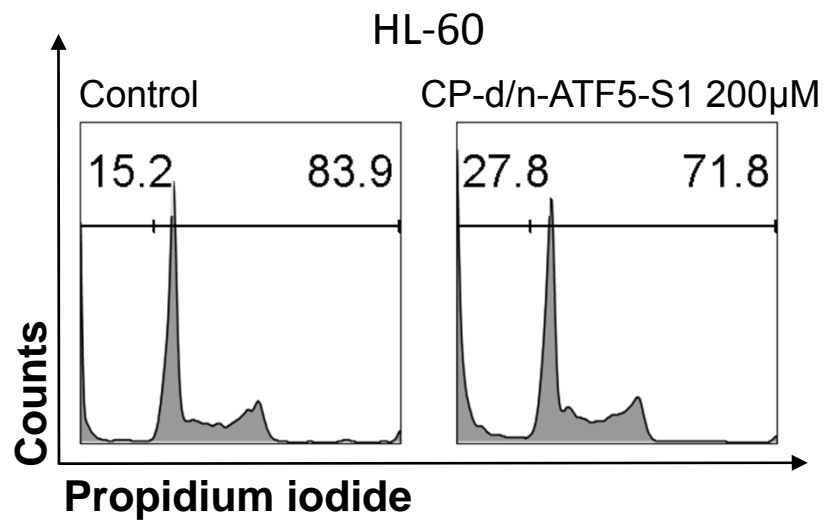

C

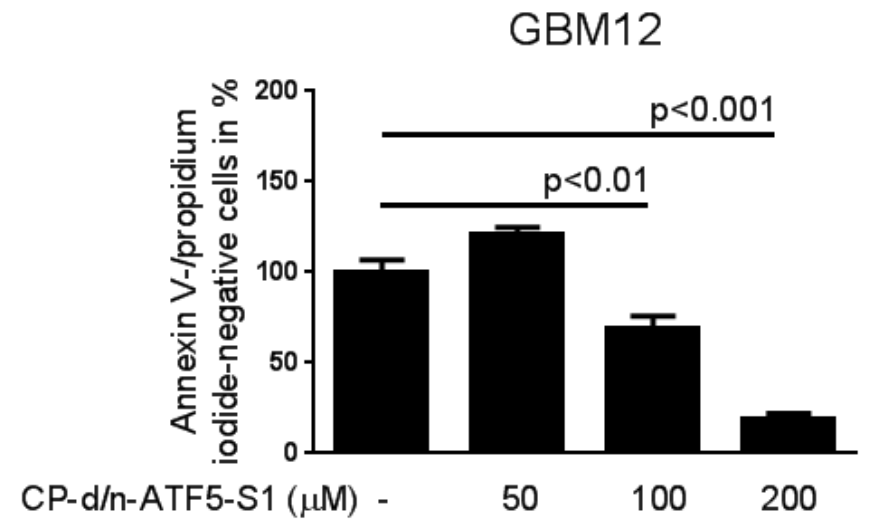

# Supplementary figure 5

A

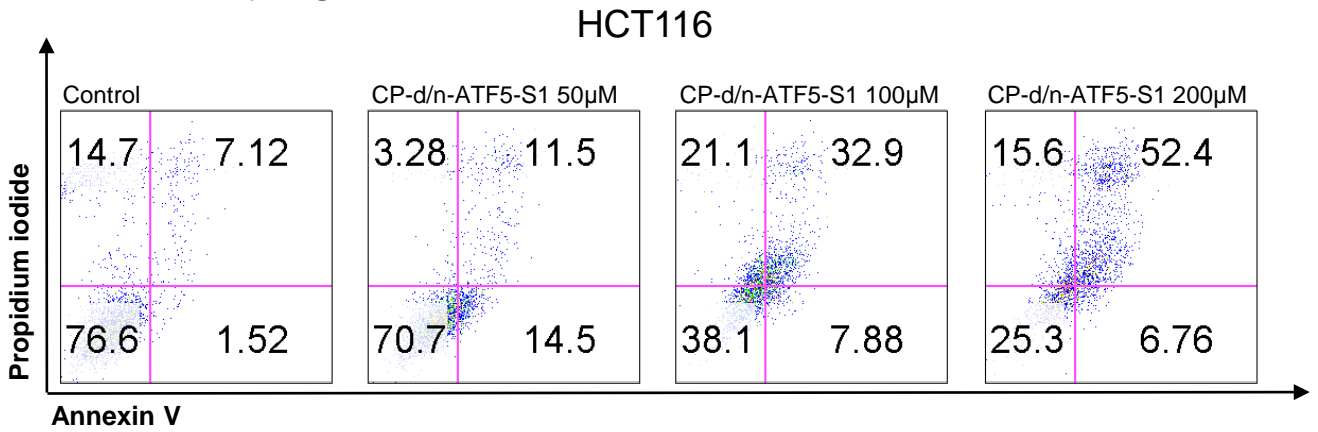

B

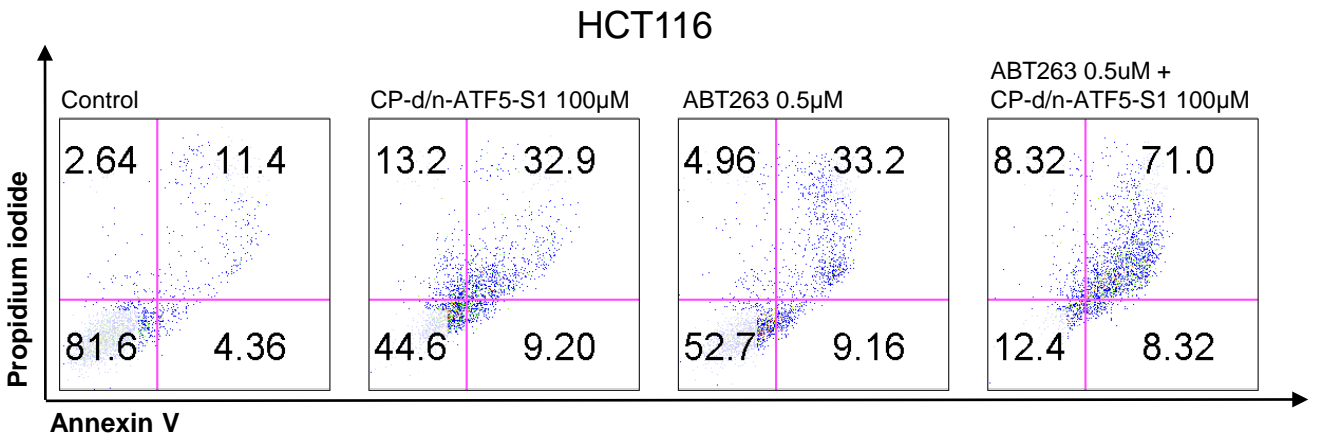

C

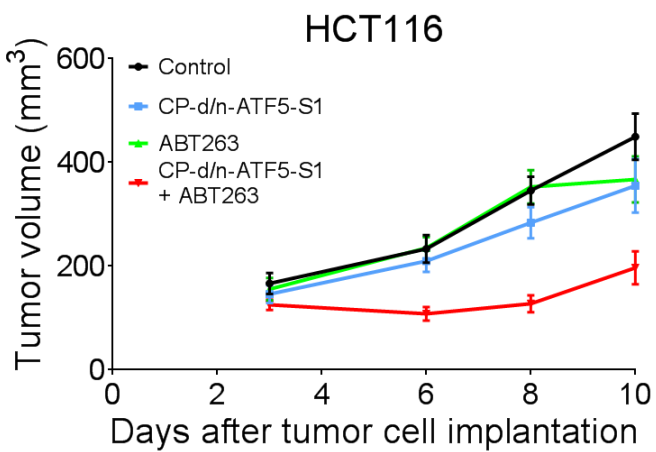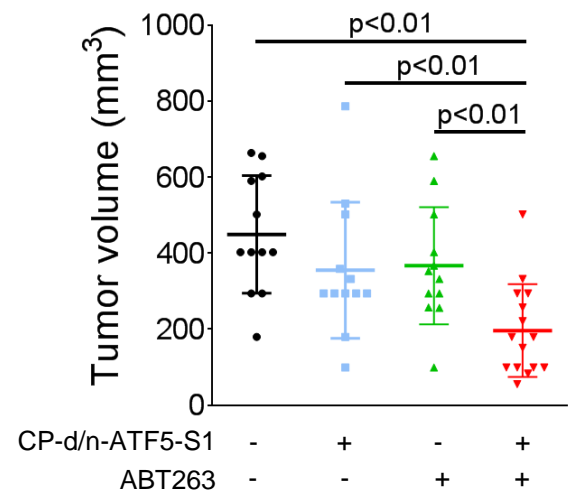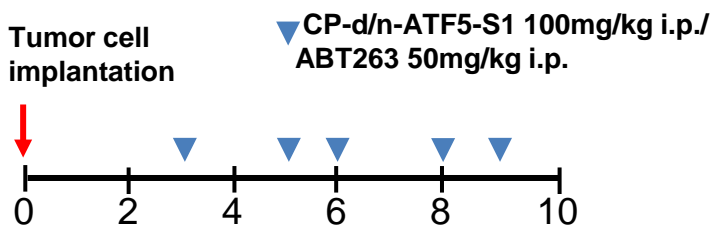

Supplementary figure 6

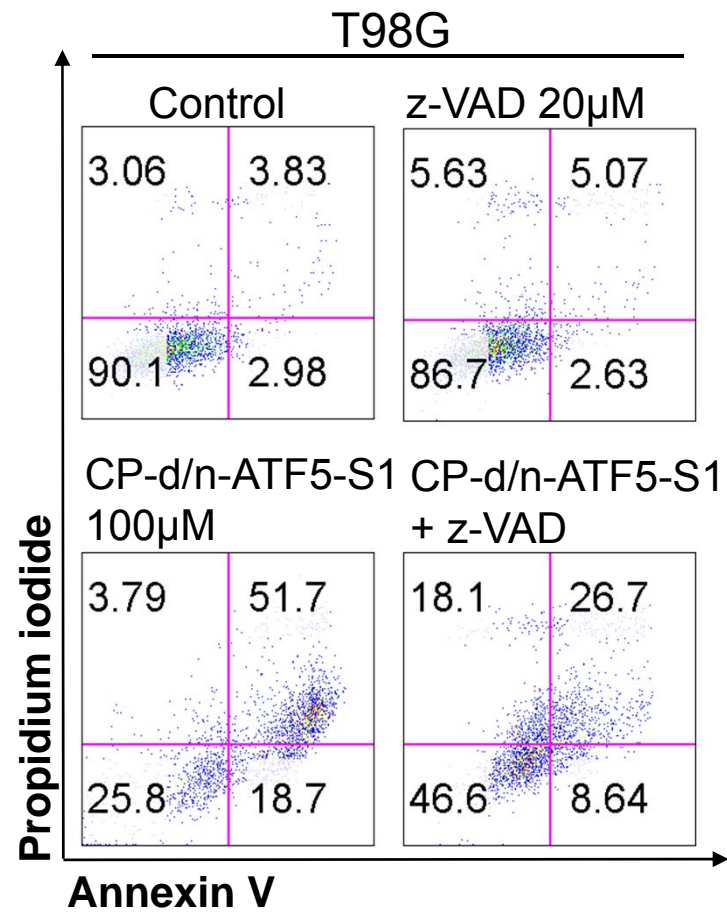



# Supplementary figure 8

A

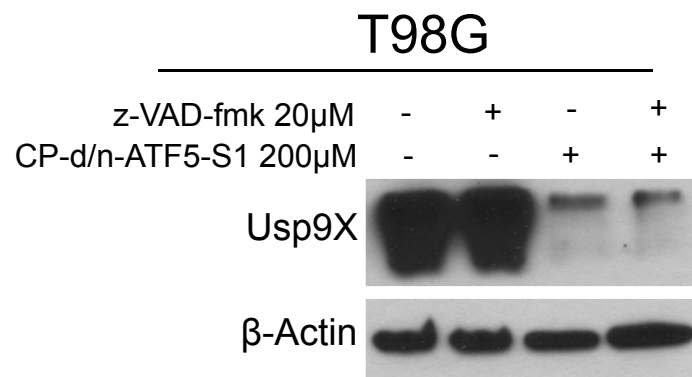

B

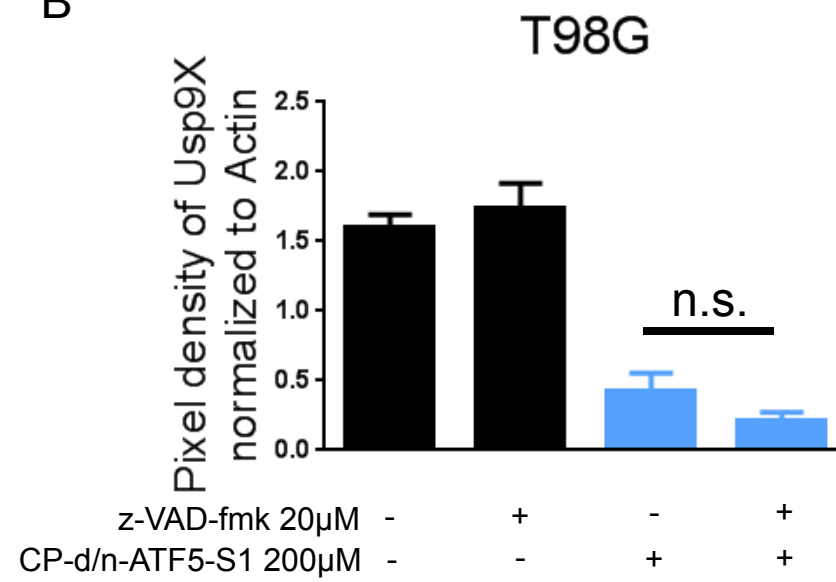



# Supplementary figure 9

A

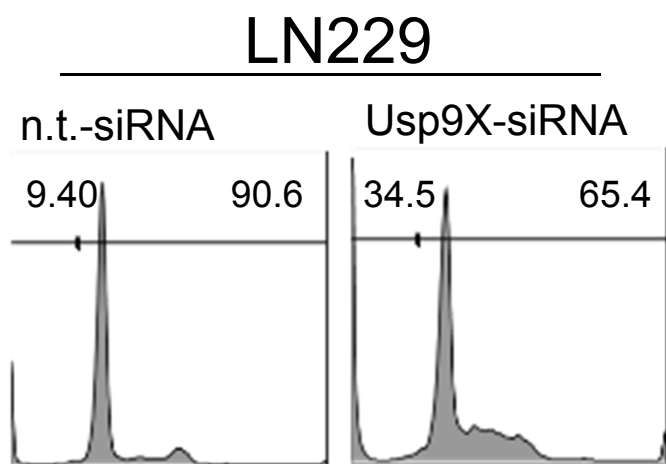

B

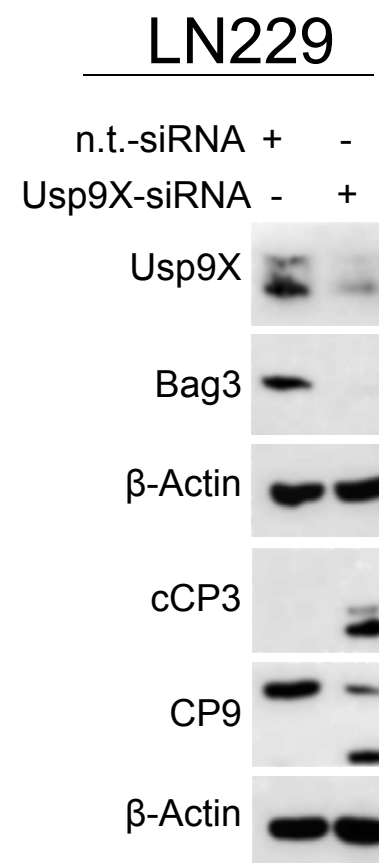

# Supplementary figure 10

A

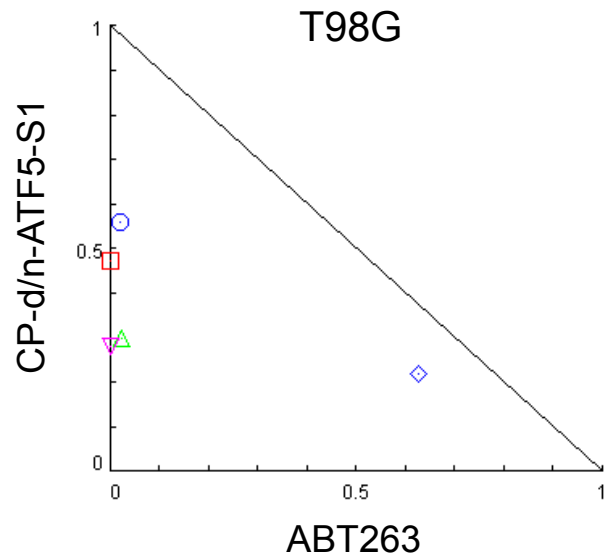

|   | CP-d/n-ATF5-S1<br>[ $\mu$ M] | ABT263<br>[ $\mu$ M] | CI      |
|---|------------------------------|----------------------|---------|
| ○ | 200.0                        | 2.0                  | 0.5796  |
| □ | 200.0                        | 0.125                | 0.47137 |
| △ | 100.0                        | 1.0                  | 0.32249 |
| ▽ | 100.0                        | 0.25                 | 0.28172 |
| ◇ | 50.0                         | 0.5                  | 0.84381 |

B

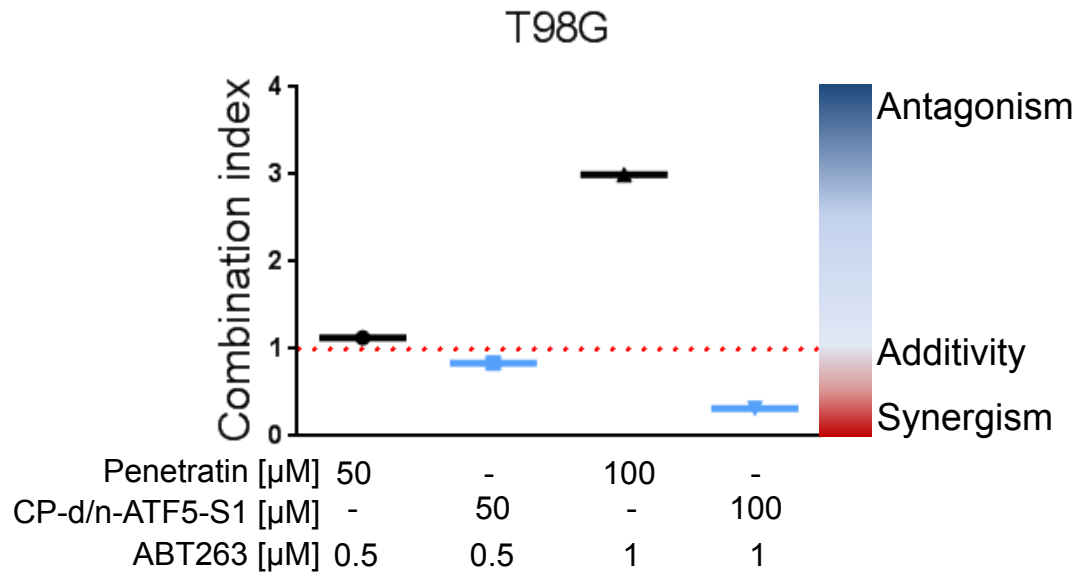

Supplementary figure 11

GBM12

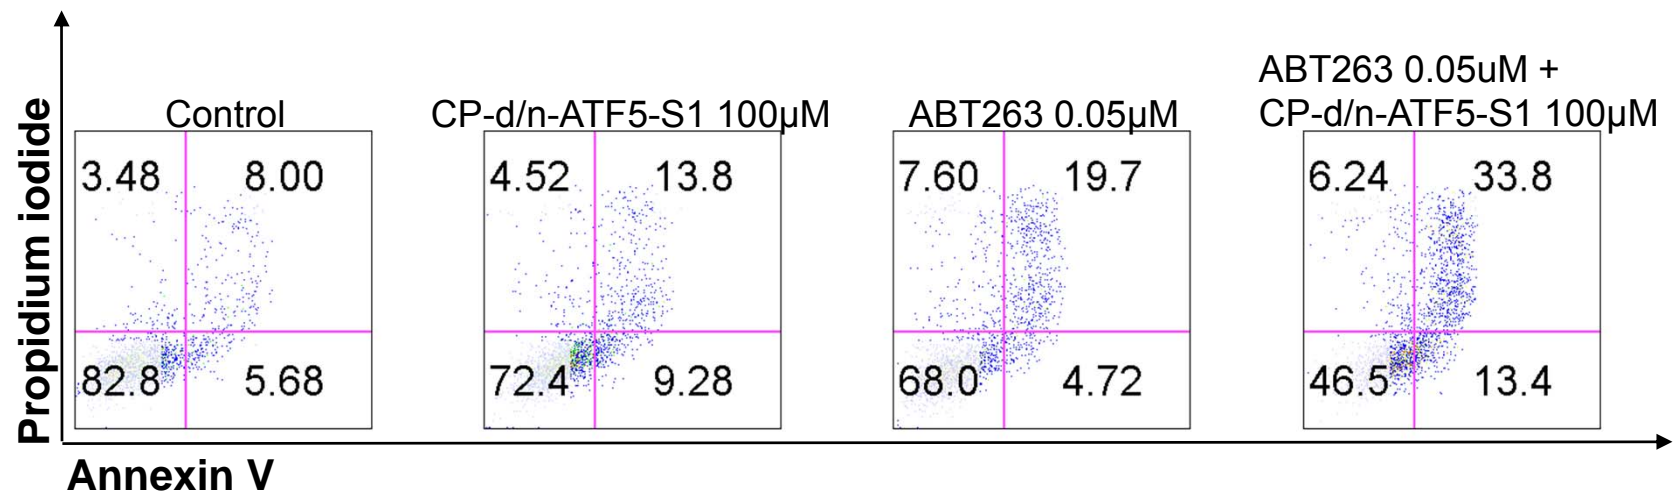

# Supplementary figure 12

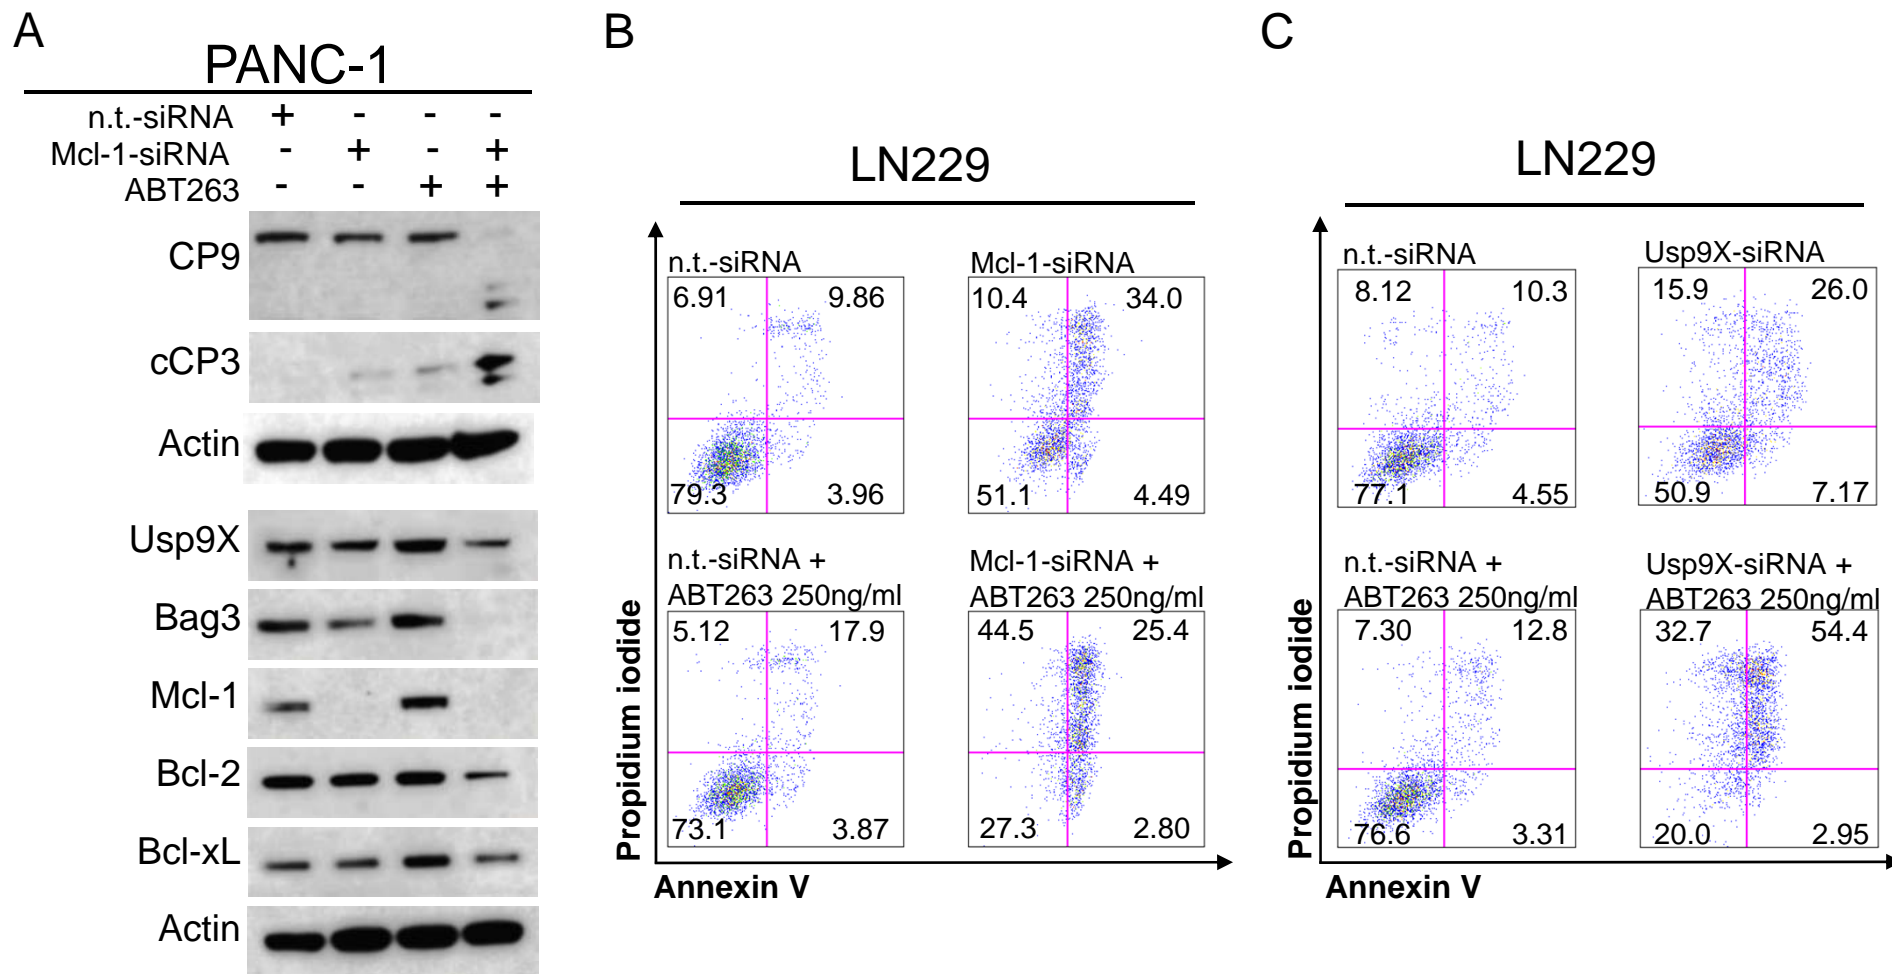

# Supplementary figure 13

A

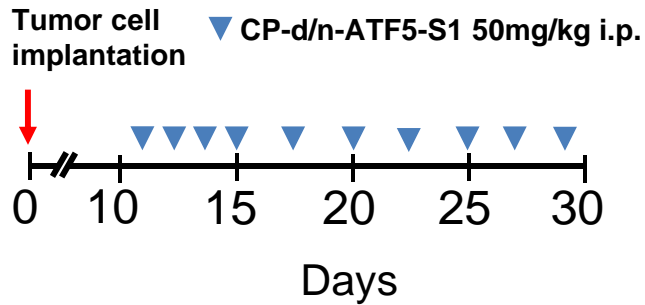

B

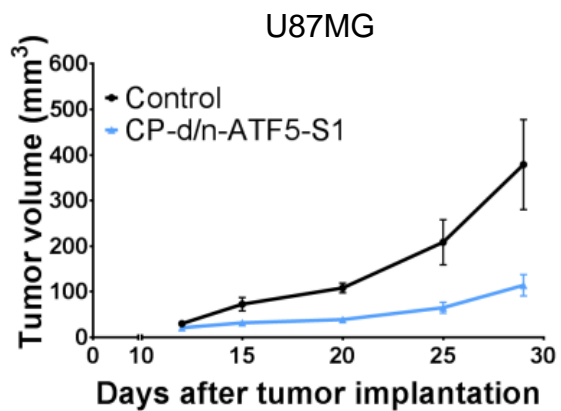

C

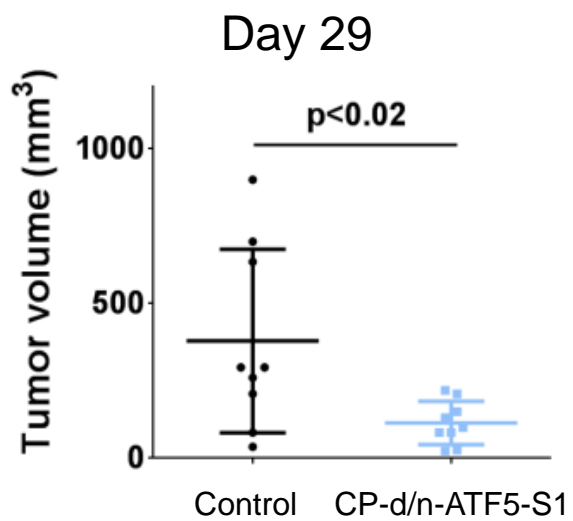

D

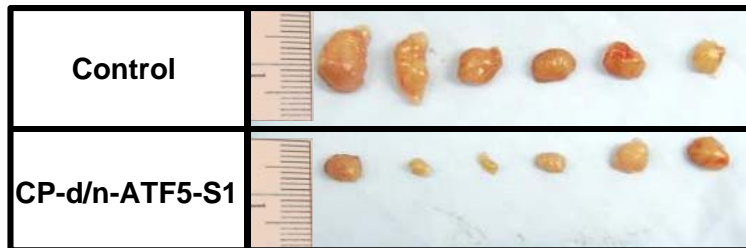

# Supplementary figure 14

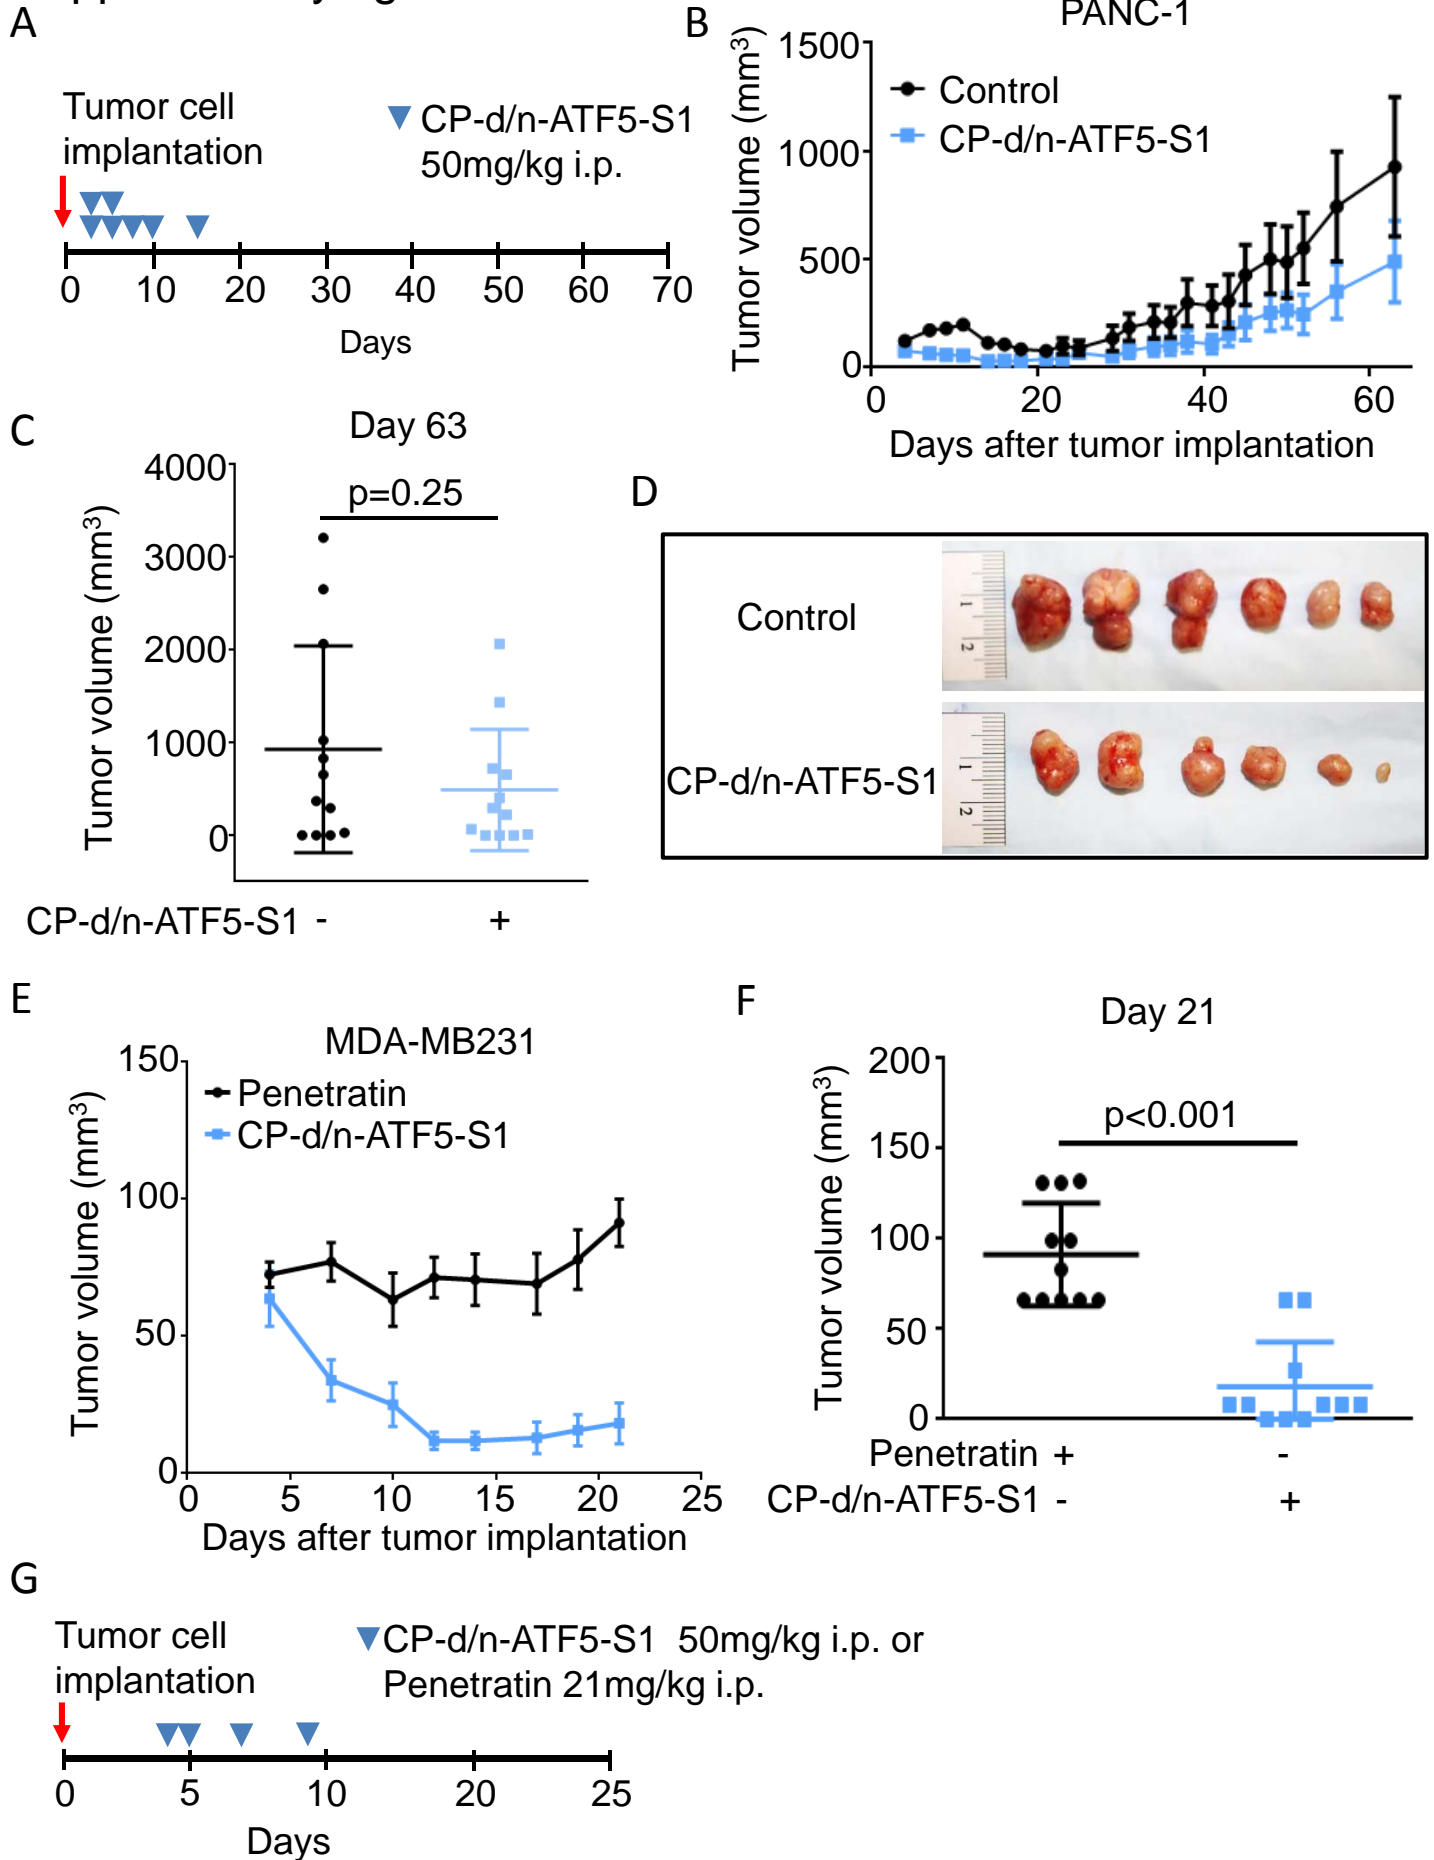

# Supplementary figure 15

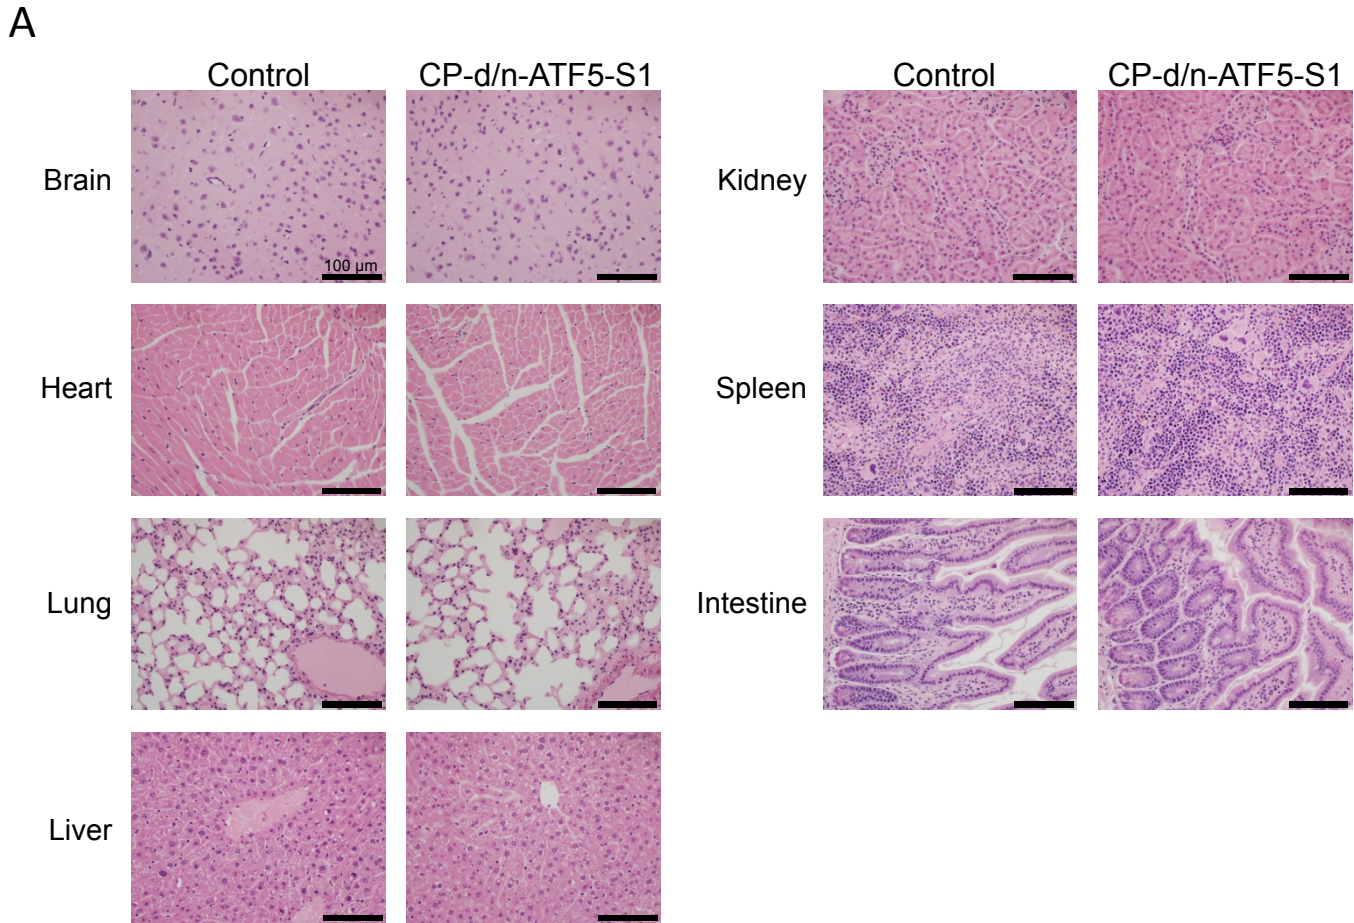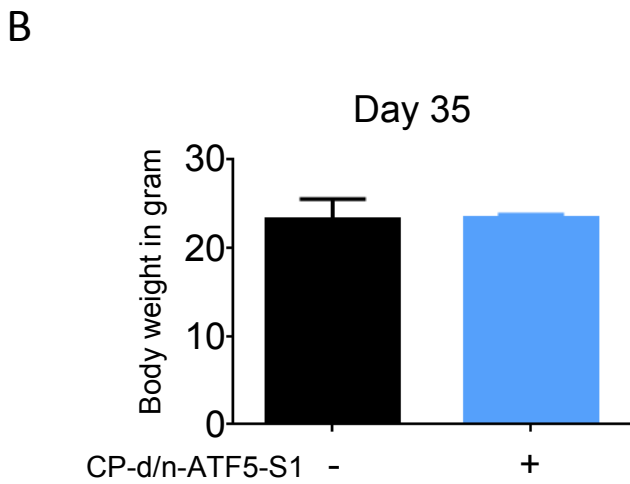

Supplement: NIHMS782181-supplement-1.pdf [file NIHMS782181-supplement-1.pdf]
